# Supplementary material for: Expanding the TNM for cancers of the colon and rectum using machine learning: a demonstration
Source: PubMed Central journal article supplement — ESMO Open. 2019 Jun 12;4(3):e000518. doi: 10.1136/esmoopen-2019-000518 (PMC6579577; doi:10.1136/esmoopen-2019-000518), 2019-06-12
Supplement: esmoopen-2019-000518supp003.pdf [file esmoopen-2019-000518supp003.pdf]

**Supplementary Table 1 – Definition of levels of factors for SEER colon and rectal cancer patients**  
 (Refer to [1,2,3] for specifics of the 4th column.)

|                   |                                          |     |                                                                                                      |
|-------------------|------------------------------------------|-----|------------------------------------------------------------------------------------------------------|
| Primary Tumor (T) | Dataset 1 (10-12) &<br>Dataset 2 (04-10) | Tis | Carcinoma in situ:<br>intraepithelial or<br>invasion of<br>lamina propria                            |
|                   |                                          | T1  | Tumor invades<br>submucosa                                                                           |
|                   |                                          | T2  | Tumor invades<br>muscularis propria                                                                  |
|                   |                                          | T3  | Tumor invades<br>through the<br>muscularis propria<br>into<br>pericorectal tissues                   |
|                   | Dataset 1 (10-12)                        | T4a | Tumor penetrates to<br>the surface of the<br>visceral<br>peritoneum                                  |
|                   |                                          | T4b | Tumor directly<br>invades or is adherent<br>to other<br>organs or structures                         |
|                   | Dataset 2 (04-10)                        | T4  | Tumor directly<br>invades other organs<br>or structures,<br>and/or perforates<br>visceral peritoneum |

|                          |                                       |     |                                                                                       |
|--------------------------|---------------------------------------|-----|---------------------------------------------------------------------------------------|
| Regional Lymph Nodes (N) | Dataset 1 (10-12) & Dataset 2 (04-10) | N0  | No regional lymph node metastasis                                                     |
|                          |                                       | N1  | Metastasis in 1–3 regional lymph nodes                                                |
|                          | Dataset 1 (10-12)                     | N2a | Metastasis in 4–6 regional lymph nodes                                                |
|                          |                                       | N2b | Metastasis in seven or more regional lymph nodes                                      |
|                          | Dataset 2 (04-10)                     | N2  | Metastasis in 4 or more regional lymph nodes                                          |
| Distant Metastasis (M)   | Dataset 1 (04-10) & Dataset 2 (10-12) | M0  | No distant metastasis                                                                 |
|                          | Dataset 2 (10-12)                     | M1a | Metastasis confined to one organ or site (e.g., liver, lung, ovary, nonregional node) |
|                          |                                       | M1b | Metastases in more than one organ/site or the peritoneum                              |
|                          | Dataset 1 (04-10)                     | M1  | Distant metastasis                                                                    |

|                                             |                   |    |                                                                                  |
|---------------------------------------------|-------------------|----|----------------------------------------------------------------------------------|
| Age of diagnosis(A)                         | Dataset 2 (04-10) | A1 | Age of diagnosis < 80                                                            |
|                                             |                   | A2 | Age of diagnosis $\geq$ 80                                                       |
| Carcinoembryonic Antigen Interpretation (C) | Dataset 2 (04-10) | C1 | Positive/elevated                                                                |
|                                             |                   | C2 | Negative/normal; within normal limits                                            |
| Location (L)                                | Dataset 2 (04-10) | Lr | Right-sided colon cancer, including cecum, ascending colon, and transverse colon |
|                                             |                   | Ll | Left-sided colon, including splenic flexure, descending colon, sigmoid colon     |
|                                             |                   | Lb | Bottom-sided colon, including rectosigmoid junction and rectum                   |

1. Greene F, Page D, Fleming I et al. AJCC Cancer Staging Manual. 6th edition: Springer, New York, 2002.
2. Edge S, Byrd D, Compton C et al. AJCC Cancer Staging Manual. 7th edition. Springer, New York, 2010.
3. SEER Research Data Record Description. Available from URL:  
<https://seer.cancer.gov/data/seerstat/nov2017/TextData.FileDescription.pdf>
