# Supplementary material for: Expanding the TNM for cancers of the colon and rectum using machine learning: a demonstration
Source: PubMed Central journal article supplement — ESMO Open. 2019 Jun 12;4(3):e000518. doi: 10.1136/esmoopen-2019-000518 (PMC6579577; doi:10.1136/esmoopen-2019-000518), 2019-06-12
Supplement: esmoopen-2019-000518supp004.pdf [file esmoopen-2019-000518supp004.pdf]

**Supplementary Table 2 – EACCD grouping of colon and rectal cancer patients in dataset 2 according to T, N, M, A, C and L**

| T       | N  | M  | A  | C  | L  |
|---------|----|----|----|----|----|
| Group 1 |    |    |    |    |    |
| Tis     | N0 | M0 | A1 | C2 | Lb |
| Tis     | N0 | M0 | A1 | C2 | Ll |
| Tis     | N0 | M0 | A1 | C2 | Lr |
| T1      | N0 | M0 | A1 | C2 | Lb |
| T1      | N0 | M0 | A1 | C2 | Ll |
| T1      | N0 | M0 | A1 | C2 | Lr |
| T1      | N1 | M0 | A1 | C2 | Lb |
| T1      | N1 | M0 | A1 | C2 | Ll |
| T2      | N0 | M0 | A1 | C1 | Ll |
| T2      | N0 | M0 | A1 | C1 | Lr |
| T2      | N0 | M0 | A1 | C2 | Lb |
| T2      | N0 | M0 | A1 | C2 | Ll |
| T2      | N0 | M0 | A1 | C2 | Lr |
| T2      | N1 | M0 | A1 | C2 | Ll |
| T2      | N1 | M0 | A1 | C2 | Lr |
| T3      | N0 | M0 | A1 | C2 | Lr |
| Group 2 |    |    |    |    |    |
| T1      | N1 | M0 | A1 | C2 | Lr |
| T2      | N0 | M0 | A2 | C2 | Lr |

|         |    |    |    |    |    |
|---------|----|----|----|----|----|
| T2      | N1 | M0 | A1 | C2 | Lb |
| T3      | N0 | M0 | A1 | C2 | Ll |
| Group 3 |    |    |    |    |    |
| T1      | N0 | M0 | A1 | C1 | Ll |
| T1      | N0 | M0 | A1 | C1 | Lr |
| T2      | N0 | M0 | A1 | C1 | Lb |
| T2      | N0 | M0 | A2 | C2 | Ll |
| T3      | N0 | M0 | A1 | C1 | Lr |
| T3      | N0 | M0 | A1 | C2 | Lb |
| T3      | N1 | M0 | A1 | C2 | Ll |
| Group 4 |    |    |    |    |    |
| T1      | N0 | M0 | A2 | C2 | Ll |
| T1      | N0 | M0 | A2 | C2 | Lr |
| T2      | N0 | M0 | A2 | C1 | Lr |
| T2      | N1 | M0 | A1 | C1 | Ll |
| T2      | N1 | M0 | A1 | C1 | Lr |
| T2      | N2 | M0 | A1 | C2 | Lb |
| T3      | N0 | M0 | A1 | C1 | Ll |
| T3      | N0 | M0 | A2 | C2 | Lr |
| T3      | N1 | M0 | A1 | C2 | Lr |
| Group 5 |    |    |    |    |    |
| T1      | N0 | M0 | A1 | C1 | Lb |

|         |    |    |    |    |    |
|---------|----|----|----|----|----|
| T2      | N0 | M0 | A2 | C1 | L1 |
| T2      | N0 | M0 | A2 | C2 | Lb |
| T2      | N1 | M0 | A1 | C1 | Lb |
| T2      | N1 | M0 | A2 | C2 | Lr |
| T3      | N0 | M0 | A1 | C1 | Lb |
| T3      | N0 | M0 | A2 | C1 | Lr |
| T3      | N0 | M0 | A2 | C2 | L1 |
| T3      | N1 | M0 | A1 | C1 | L1 |
| T3      | N1 | M0 | A1 | C1 | Lr |
| T3      | N1 | M0 | A1 | C2 | Lb |
| T3      | N2 | M0 | A1 | C2 | L1 |
| T4      | N0 | M0 | A1 | C2 | L1 |
| T4      | N0 | M0 | A1 | C2 | Lr |
| Group 6 |    |    |    |    |    |
| T1      | N0 | M0 | A2 | C1 | L1 |
| T1      | N0 | M0 | A2 | C2 | Lb |
| T2      | N0 | M0 | A2 | C1 | Lb |
| T3      | N0 | M0 | A2 | C1 | L1 |
| T3      | N0 | M0 | A2 | C2 | Lb |
| T3      | N1 | M0 | A1 | C1 | Lb |
| T3      | N1 | M0 | A2 | C2 | L1 |
| T3      | N1 | M0 | A2 | C2 | Lr |
| T3      | N2 | M0 | A1 | C1 | L1 |
| T3      | N2 | M0 | A1 | C2 | Lb |

|         |    |    |    |    |    |
|---------|----|----|----|----|----|
| T3      | N2 | M0 | A1 | C2 | Lr |
| T4      | N0 | M0 | A1 | C1 | Ll |
| T4      | N0 | M0 | A1 | C1 | Lr |
| T4      | N0 | M0 | A1 | C2 | Lb |
| T4      | N1 | M0 | A1 | C2 | Ll |
| T4      | N1 | M0 | A1 | C2 | Lr |
| Group 7 |    |    |    |    |    |
| T3      | N0 | M0 | A2 | C1 | Lb |
| T3      | N1 | M0 | A2 | C1 | Lr |
| T3      | N1 | M0 | A2 | C2 | Lb |
| T3      | N2 | M0 | A1 | C1 | Lb |
| T4      | N0 | M0 | A2 | C2 | Lr |
| T4      | N1 | M0 | A1 | C2 | Lb |
| T4      | N2 | M0 | A1 | C2 | Ll |
| Group 8 |    |    |    |    |    |
| T1      | N0 | M0 | A2 | C1 | Lb |
| T1      | N0 | M0 | A2 | C1 | Lr |
| T3      | N0 | M1 | A1 | C2 | Lb |
| T3      | N0 | M1 | A1 | C2 | Ll |
| T3      | N0 | M1 | A1 | C2 | Lr |
| T3      | N1 | M0 | A2 | C1 | Lb |
| T3      | N1 | M0 | A2 | C1 | Ll |
| T3      | N1 | M1 | A1 | C2 | Lb |

|         |    |    |    |    |    |
|---------|----|----|----|----|----|
| T3      | N1 | M1 | A1 | C2 | L1 |
| T3      | N2 | M0 | A1 | C1 | Lr |
| T3      | N2 | M0 | A2 | C2 | Lb |
| T3      | N2 | M0 | A2 | C2 | L1 |
| T3      | N2 | M0 | A2 | C2 | Lr |
| T3      | N2 | M1 | A1 | C2 | Lb |
| T4      | N0 | M0 | A1 | C1 | Lb |
| T4      | N0 | M0 | A2 | C1 | L1 |
| T4      | N0 | M0 | A2 | C1 | Lr |
| T4      | N1 | M0 | A1 | C1 | Lb |
| T4      | N1 | M0 | A1 | C1 | L1 |
| T4      | N1 | M0 | A1 | C1 | Lr |
| T4      | N2 | M0 | A1 | C1 | Lb |
| T4      | N2 | M0 | A1 | C1 | L1 |
| T4      | N2 | M0 | A1 | C2 | Lb |
| T4      | N2 | M0 | A1 | C2 | Lr |
| Group 9 |    |    |    |    |    |
| T3      | N0 | M1 | A1 | C1 | Lb |
| T3      | N0 | M1 | A1 | C1 | L1 |
| T3      | N0 | M1 | A1 | C1 | Lr |
| T3      | N1 | M1 | A1 | C1 | Lb |
| T3      | N1 | M1 | A1 | C1 | L1 |
| T3      | N1 | M1 | A1 | C2 | Lr |
| T3      | N2 | M0 | A2 | C1 | Lb |

|          |    |    |    |    |    |
|----------|----|----|----|----|----|
| T3       | N2 | M0 | A2 | C1 | L1 |
| T3       | N2 | M0 | A2 | C1 | Lr |
| T3       | N2 | M1 | A1 | C1 | Lb |
| T3       | N2 | M1 | A1 | C1 | L1 |
| T3       | N2 | M1 | A1 | C2 | L1 |
| T4       | N1 | M0 | A2 | C1 | Lr |
| T4       | N1 | M0 | A2 | C2 | Lr |
| T4       | N1 | M1 | A1 | C2 | L1 |
| T4       | N1 | M1 | A1 | C2 | Lr |
| T4       | N2 | M0 | A1 | C1 | Lr |
| T4       | N2 | M1 | A1 | C2 | L1 |
| Group 10 |    |    |    |    |    |
| T1       | N0 | M1 | A1 | C1 | Lb |
| T1       | N0 | M1 | A1 | C1 | L1 |
| T1       | N0 | M1 | A1 | C1 | Lr |
| T1       | N1 | M1 | A1 | C1 | Lb |
| T3       | N1 | M1 | A1 | C1 | Lr |
| T3       | N1 | M1 | A2 | C1 | Lr |
| T3       | N2 | M1 | A1 | C1 | Lr |
| T3       | N2 | M1 | A1 | C2 | Lr |
| T3       | N2 | M1 | A2 | C1 | Lr |
| T4       | N0 | M1 | A1 | C1 | Lb |
| T4       | N0 | M1 | A1 | C1 | L1 |
| T4       | N0 | M1 | A1 | C1 | Lr |

|    |    |    |    |    |    |
|----|----|----|----|----|----|
| T4 | N1 | M1 | A1 | C1 | Lb |
| T4 | N1 | M1 | A1 | C1 | Ll |
| T4 | N1 | M1 | A1 | C1 | Lr |
| T4 | N1 | M1 | A2 | C1 | Lr |
| T4 | N2 | M0 | A2 | C1 | Lr |
| T4 | N2 | M1 | A1 | C1 | Lb |
| T4 | N2 | M1 | A1 | C1 | Ll |
| T4 | N2 | M1 | A1 | C1 | Lr |
| T4 | N2 | M1 | A1 | C2 | Lr |
| T4 | N2 | M1 | A2 | C1 | Lr |
