# Supplementary material for: Expanding the TNM for cancers of the colon and rectum using machine learning: a demonstration
Source: PubMed Central journal article supplement — ESMO Open. 2019 Jun 12;4(3):e000518. doi: 10.1136/esmoopen-2019-000518 (PMC6579577; doi:10.1136/esmoopen-2019-000518), 2019-06-12
Supplement: esmoopen-2019-000518supp005.pdf [file esmoopen-2019-000518supp005.pdf]

**Supplementary Table 3 – Contingency table between EACCD grouping and AJCC staging on the basis of T, N, M, and dataset 1**

|       | 0    | I     | IIA   | IIB  | IIC  | IIIA | IIIB  | IIIC | IVA  | IVB  | Total |
|-------|------|-------|-------|------|------|------|-------|------|------|------|-------|
| 1     | 2721 | 17905 | 0     | 0    | 0    | 0    | 0     | 0    | 0    | 0    | 20626 |
| 2     | 0    | 0     | 16392 | 0    | 0    | 2577 | 235   | 0    | 0    | 0    | 19204 |
| 3     | 0    | 0     | 0     | 0    | 0    | 0    | 9467  | 0    | 0    | 0    | 9467  |
| 4     | 0    | 0     | 0     | 1452 | 0    | 0    | 2356  | 0    | 0    | 0    | 3808  |
| 5     | 0    | 0     | 0     | 0    | 1573 | 0    | 1363  | 2386 | 0    | 0    | 5322  |
| 6     | 0    | 0     | 0     | 0    | 0    | 0    | 0     | 1223 | 0    | 0    | 1223  |
| 7     | 0    | 0     | 0     | 0    | 0    | 0    | 0     | 580  | 2875 | 0    | 3455  |
| 8     | 0    | 0     | 0     | 0    | 0    | 0    | 0     | 306  | 2260 | 1604 | 4170  |
| 9     | 0    | 0     | 0     | 0    | 0    | 0    | 0     | 0    | 145  | 605  | 750   |
| 10    | 0    | 0     | 0     | 0    | 0    | 0    | 0     | 0    | 516  | 2274 | 2790  |
| Total | 2721 | 17905 | 16392 | 1452 | 1573 | 2577 | 13421 | 4495 | 5796 | 4483 | 70815 |
